# Supplementary material for: Surface dynamics of poly(methyl methacrylate) films affected by the concentration of casting solutions
Source: Royal Society of Chemistry journal article supplement (doi:10.1039/c4sm00918e), 2014-01-01
Supplement: c4sm00918e1.pdf [file c4sm00918e1.pdf]

## Supplementary Information for:

# Surface Dynamics of Poly (Methyl methacrylate) Chains Affected by Concentration of Casting Solution

*Houkuan Tian, Yuhui Yang, Jia Ding, Wanglong Liu, Biao Zuo, Juping Yang,*

*Xinping Wang\**

Department of Chemistry, Key Laboratory of Advanced Textile Materials and Manufacturing  
Technology of Education Ministry, Zhejiang Sci-Tech University, Hangzhou 310018, China

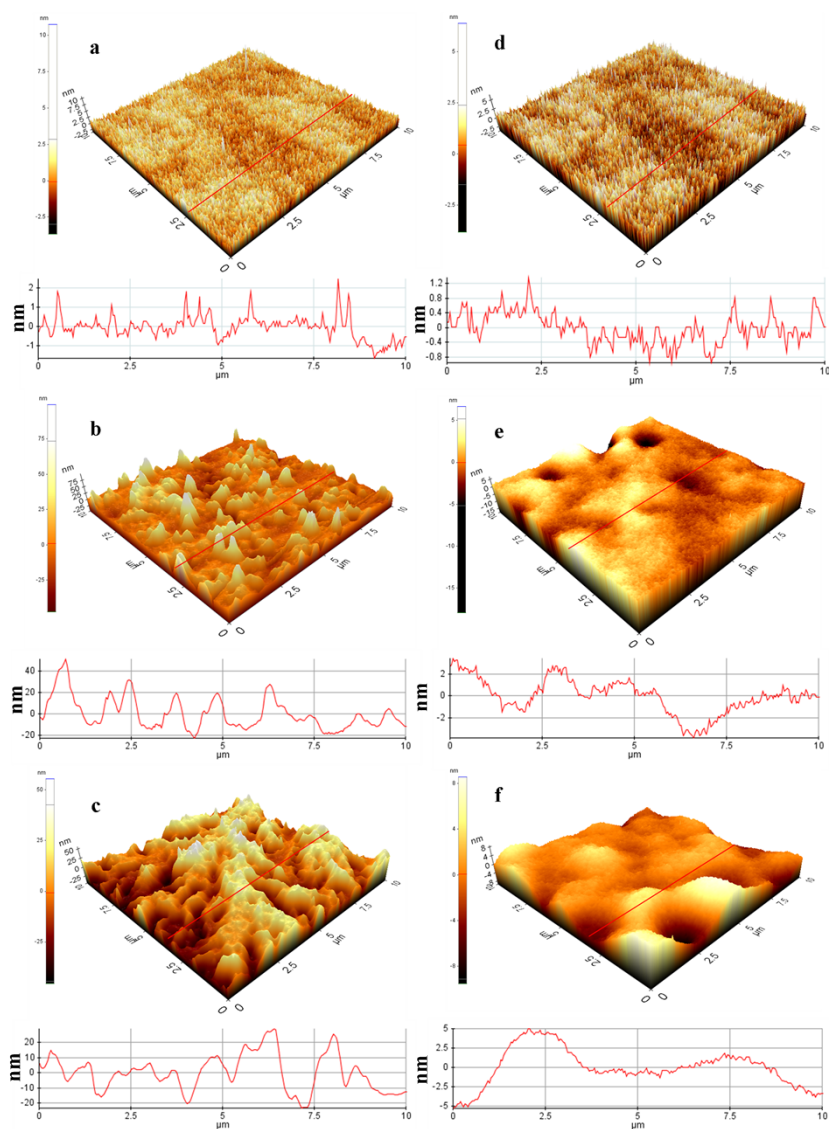

Fig. S1 AFM topography images of PMMA<sub>430</sub>-ec-PFMA<sub>2</sub> spin-coated films before (a,b,c) and after annealing at 120°C (d,e,f). (a) prepared from the PMMA<sub>430</sub>-ec-PFMA<sub>2</sub> cyclohexanone solution. (b) and (c) prepared from the PMMA<sub>430</sub>-ec-PFMA<sub>2</sub> solutions with mixed solvent, the volume ratio of cyclohexanone and ethanol were 9:1 and 6:4 respectively (concentration:3.5%).

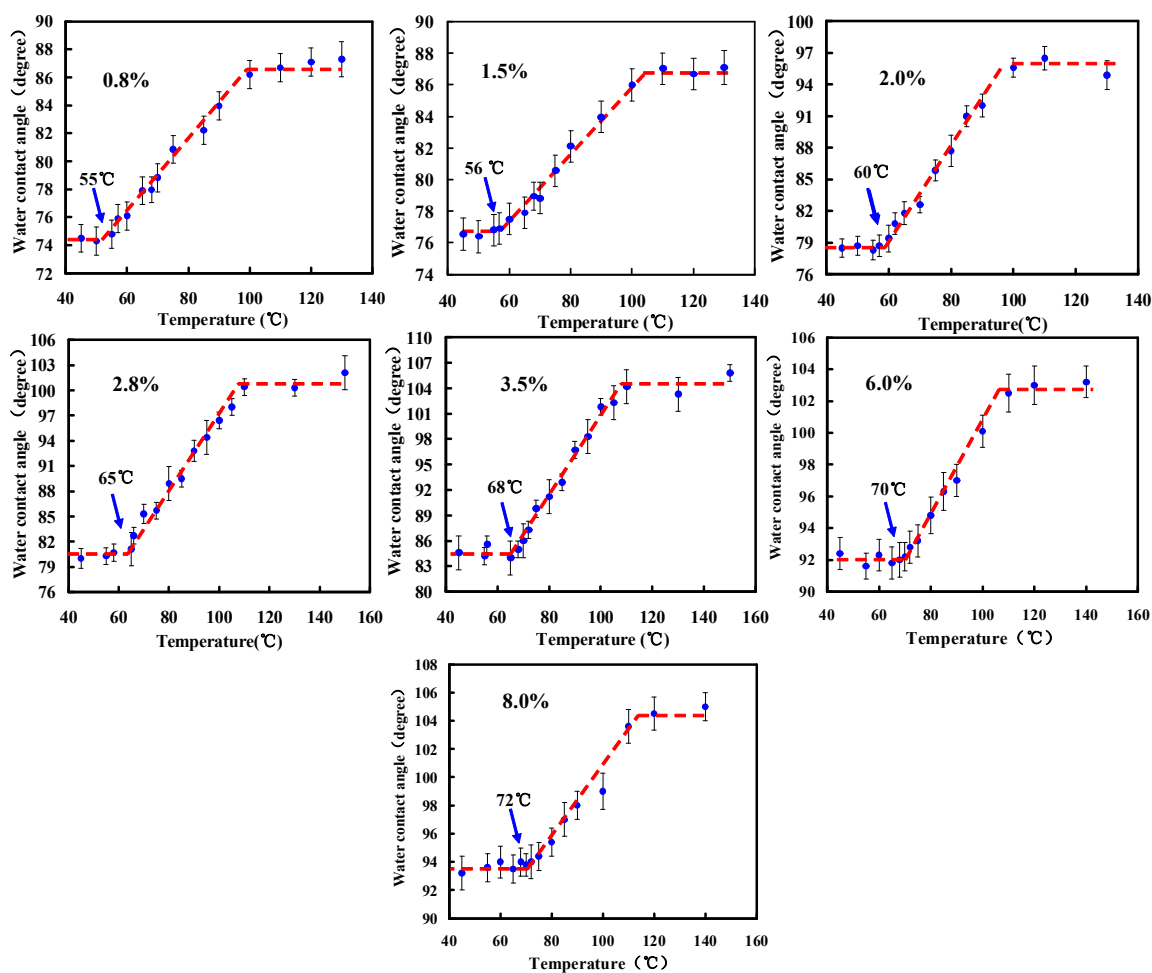

**Fig. S2** Water contact angle of spin-coated PMMA<sub>430</sub>-*ec*-PFMA<sub>2</sub> films prepared from different concentration (wt%) of casting solutions as a function of annealing temperature. Annealing time: 24 h. The dotted line is a guide to the eye.

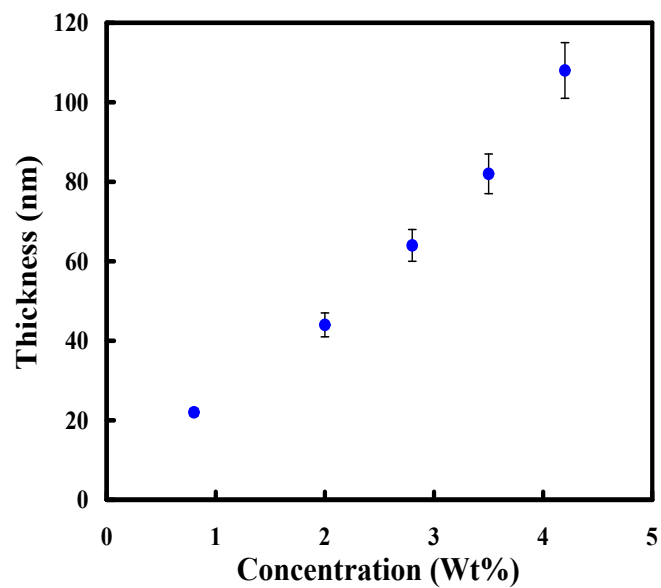

**Fig. S3** The films thickness vs the concentration of casting solutions.

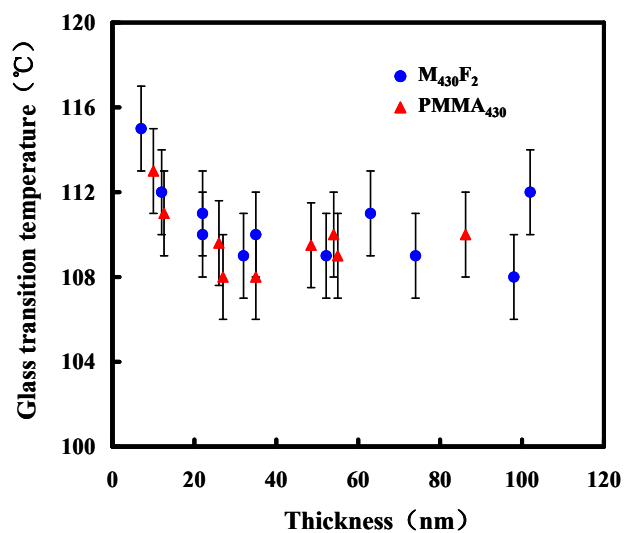

**Fig.S4** Measured glass transition temperature ( $T_g$ ) vs film thickness for  $PMMA_{430}$ -ec-PFMA<sub>2</sub> films (solid circles) and  $PMMA_{430}$  films (triangles) by ellipsometry.

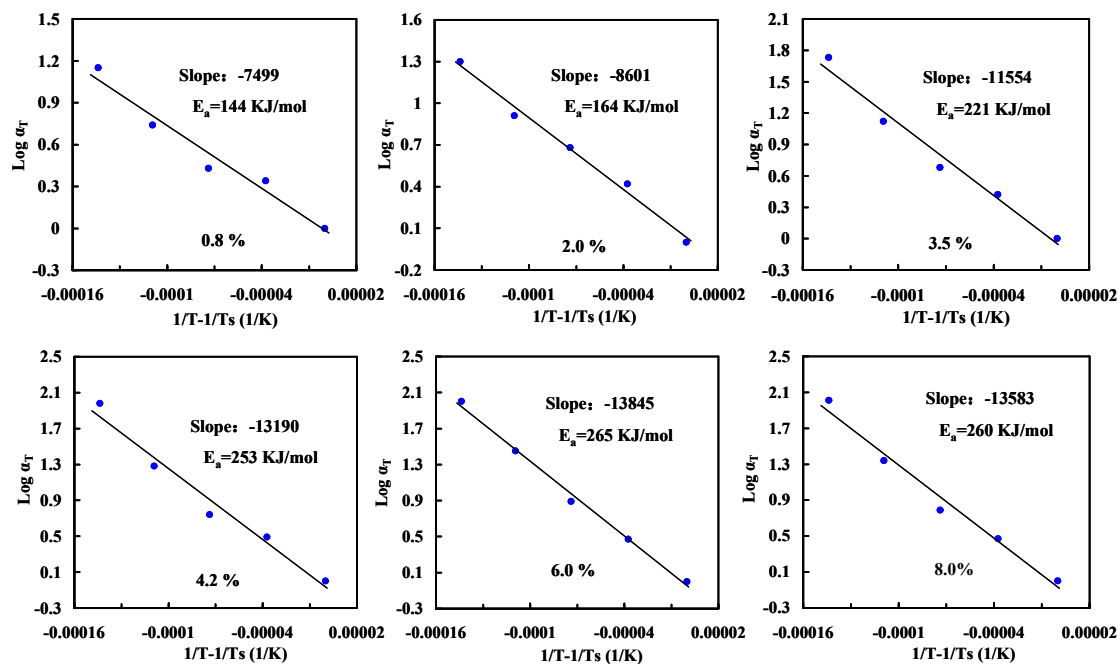

**Fig. S5** Arrhenius plots of  $\alpha_T$  vs. temperature for PMMA<sub>430</sub>-ec-PFMA<sub>2</sub> films prepared from various concentrations of casting solutions. The solid line is linear least-squares fits by a modified Arrhenius equation described in Eq. 1 to the data with a slope for elucidating the activation energy.
